# Supplementary material
Source: PubMed Central journal article supplement (PMC7045316)
Supplement: ao9b03313_si_001.pdf [file ao9b03313_si_001.pdf]

## Electrostatic switching controls channel dynamics of the sensor protein VirB10 in *A. tumefaciens* Type IV secretion system.

Vidya Chandran Darbari<sup>1\*</sup>, Jonah Ciccone<sup>2</sup>, Jagdish Suresh Patel<sup>3</sup>, Barira Islam<sup>4</sup>, Pratul K Agarwal<sup>5</sup>, Shozeb Haider<sup>2\*</sup>

<sup>1</sup>Queen Mary University of London, School of Biological and Chemical Sciences, Mile End Road, London E1 4NS, United Kingdom <sup>2</sup>Department of Pharmaceutical and Biological Chemistry, University College London School of Pharmacy, WC1N 1AX London, United Kingdom <sup>3</sup>Department of Biological Sciences, University of Idaho, C/O IRIC 333, 875 Perimeter MS 1122, Moscow, Idaho 83844-1122 <sup>4</sup>Centre for Biomarker Research, School of Applied Sciences, University of Huddersfield, HD1 3DH, Huddersfield, United Kingdom <sup>5</sup>Department of Biochemistry & Cellular and Molecular Biology Department, University of Tennessee-Knoxville, Knoxville, Tennessee 37996, United States

\* To whom correspondence should be addressed: Shozeb Haider: Email: [shozeb.haider@ucl.ac.uk](mailto:shozeb.haider@ucl.ac.uk); Telephone: +44 (0) 20 7753 5883; Vidya C Darbari: Email: [v.darbari@qmul.ac.uk](mailto:v.darbari@qmul.ac.uk); Telephone +44 (0) 20 7882 6360

## Supplementary Data

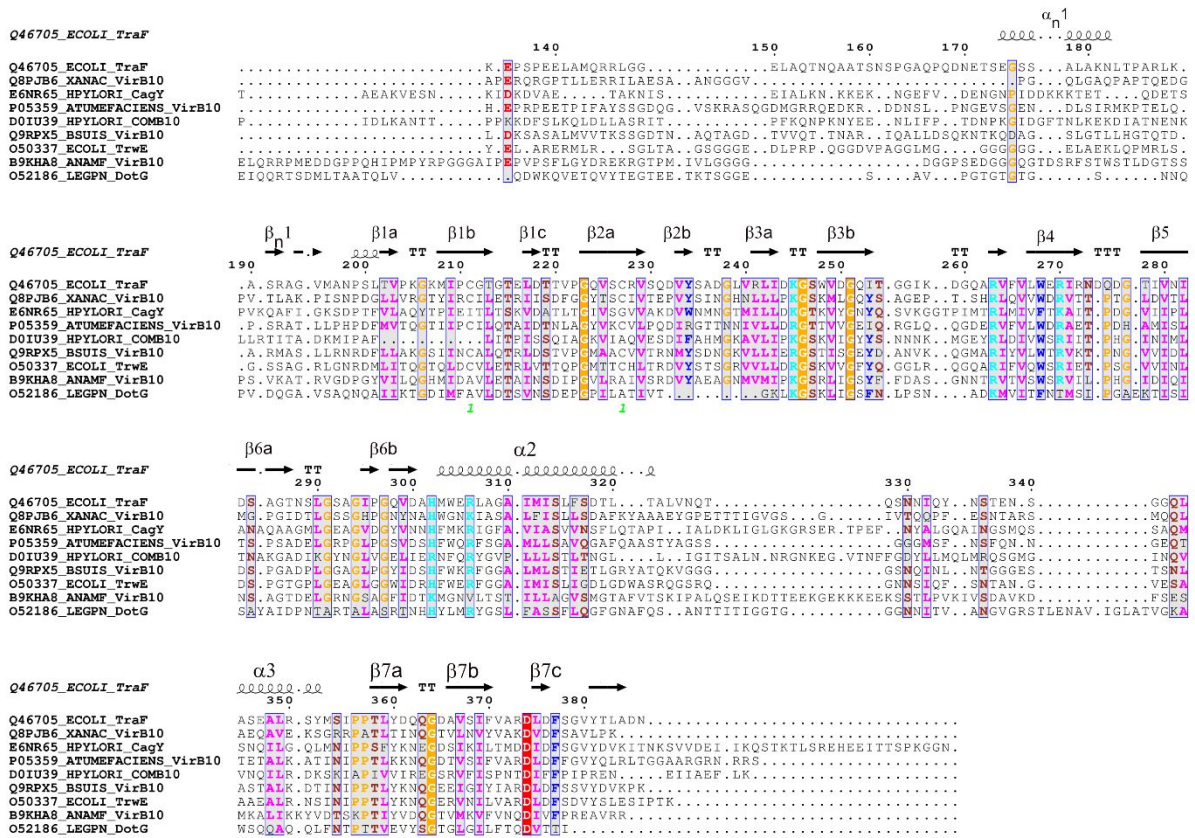

Figure S1: Multiple sequence alignment using ClustalO of VirB10 sequences from diverse T4S system including conjugation and effector translocation T4Sa and T4Sb system. Figure prepared using ESPrnt 3.0.

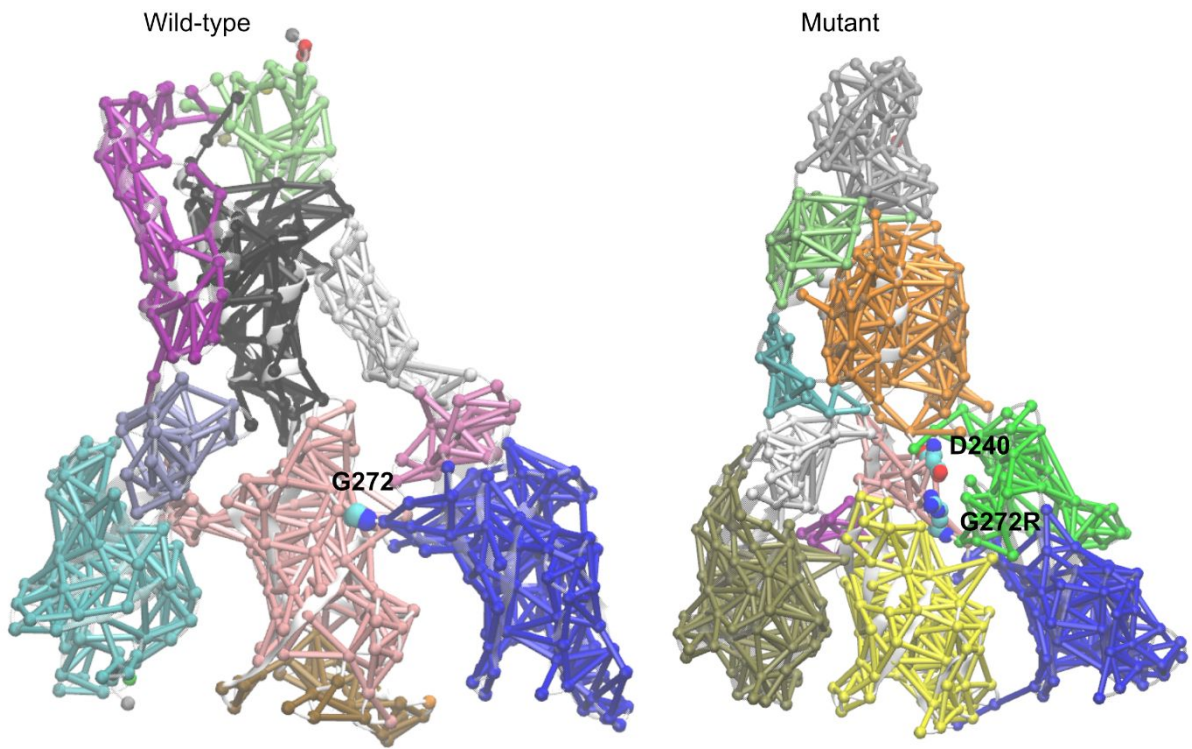

Figure S2: Network communities for Wild-type and G272R mutant *AtVirB10*.

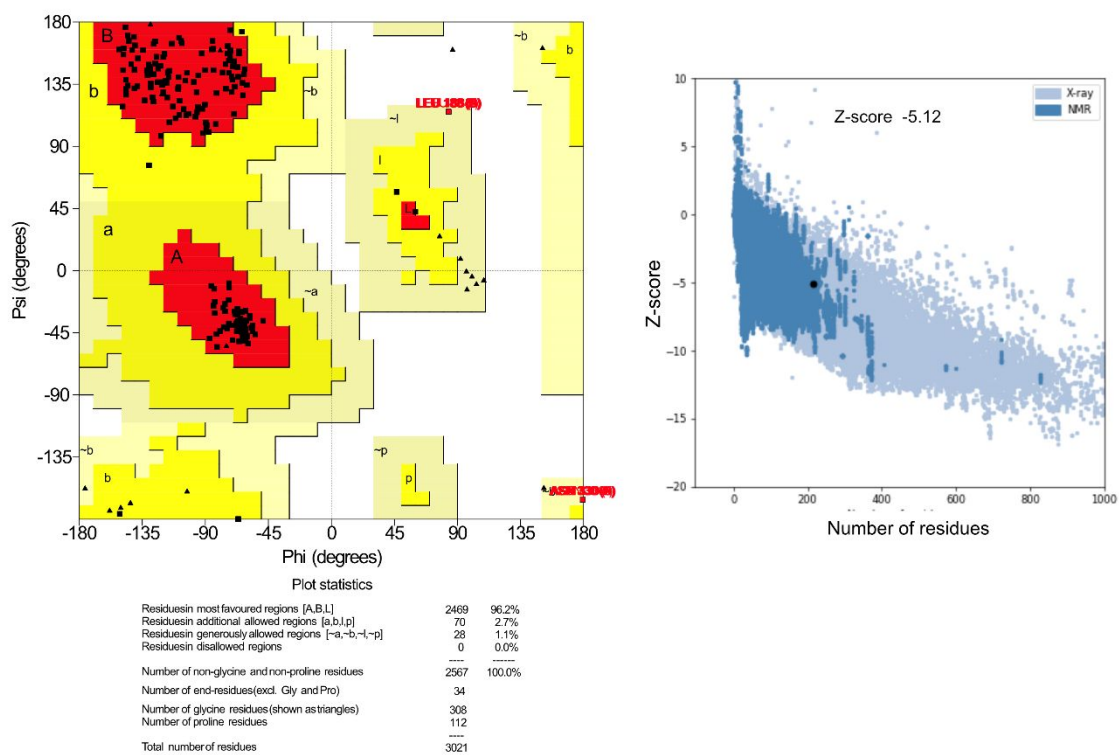

Figure S3: Stereochemical parameter checks (Ramachandran Plot from Procheck and Protein Structure Analysis) of the *A.tumefaciens* VirB10 model. The z-score indicates overall quality of the model and measures the deviation of the total energy of the structure with respect to an energy distribution derived from random conformations.
